# Supplementary material for: Physical Activity and Transitioning to Retirement: A Systematic Review
Source: PubMed Central journal article supplement (PMC3830178; doi:10.1016/j.amepre.2012.05.026), 2012-09
Supplement: mmc1.pdf [file mmc1.pdf]

# Physical Activity and Transitioning to Retirement

## A Systematic Review

Inka Barnett, MSc, Esther M.F. van Sluijs, PhD, David Ogilvie, PhD

### Appendix A

#### Tool used for the quality appraisal of the primary studies, based on Critical Appraisal Skills Programme (CASP) checklist for cohort studies

| 12-question checklist                                                                                                                                                                                                                          | Criteria                                                                                                                                                                                                                                                          | Binary thresholds for criteria                                                                                                                                                                                             |
|------------------------------------------------------------------------------------------------------------------------------------------------------------------------------------------------------------------------------------------------|-------------------------------------------------------------------------------------------------------------------------------------------------------------------------------------------------------------------------------------------------------------------|----------------------------------------------------------------------------------------------------------------------------------------------------------------------------------------------------------------------------|
| 1. Did the study address a clearly focused issue?<br>2. Did the authors use an appropriate method to answer their question?                                                                                                                    | Initial quality screening questions                                                                                                                                                                                                                               |                                                                                                                                                                                                                            |
| 3. Was the cohort recruited in an acceptable way?                                                                                                                                                                                              | Criterion 1: External validity assessment of selection bias                                                                                                                                                                                                       | Random sample and nonresponse <30% and loss of follow-up <50%=Yes (1 point)                                                                                                                                                |
| 4. (a) Was the follow-up of the subjects complete enough?<br>(b) Was the follow-up of the subjects long enough?                                                                                                                                |                                                                                                                                                                                                                                                                   | Nonrandom sample and/or nonresponse ≥30% and/or follow-up ≥50%=No (0 points)                                                                                                                                               |
| 5. Was the exposure (retirement) accurately measured to minimize bias?                                                                                                                                                                         | Criterion 2: Internal validity assessment of measurement bias (exposure: retirement)                                                                                                                                                                              | Self-reported retirement status or objective (e.g., based on company records, receipt of pension)=Yes (1 point)<br><br>Merged with participants that might not be retired (homemakers, unemployed, students)=No (0 points) |
| 6. Was the outcome (physical activity) accurately measured to minimize bias?                                                                                                                                                                   | Criterion 3: Internal validity assessment of measurement bias (outcome: physical activity)                                                                                                                                                                        | Objective measurement (e.g., accelerometer) or validated questionnaire=Yes (1 point)<br>Custom questionnaire or single question=No (0 points)                                                                              |
| 7. (a) Have the authors identified all important confounding factors?<br>(b) Have they taken account of the confounding factors in the design and/or analysis?                                                                                 | Criterion 4: Internal validity assessment of confounding                                                                                                                                                                                                          | Adjusted for all confounders (age, gender, SES, functional status) (analysis, stratification, or exclusion)=Yes (1 point)<br>Adjusted for some or none of the confounders=No (0 points)                                    |
| 8. What are the results of this study?<br>9. How precise are the results?<br>10. Do you believe the results?<br>11. Can the results be applied to the local population?<br>12. Do the results of this study fit with other available evidence? | Overall quality assessment of the results and transferability of the study findings (as determined by likelihood of selection bias (Criterion 1); measurement biases (Criteria 2 and 3); and confounding (Criterion 4). No additional quality criterion was used. |                                                                                                                                                                                                                            |

## Appendix B

### Summary of the 19 studies on retirement and physical activity that were reviewed between July 2010 and August 2010

| Study and country                            | Design (follow-up)                                           | Participants (N, age, gender, retirement status)                                                                                                       | Assessment of physical activity                                                                 | Results                                                                                                                                                                                                                                                                                                                                           | Quality ranking (0–4) |
|----------------------------------------------|--------------------------------------------------------------|--------------------------------------------------------------------------------------------------------------------------------------------------------|-------------------------------------------------------------------------------------------------|---------------------------------------------------------------------------------------------------------------------------------------------------------------------------------------------------------------------------------------------------------------------------------------------------------------------------------------------------|-----------------------|
| Berger (2005) <sup>1</sup><br>United Kingdom | Cohort<br>(4.5 years)<br>Population-based                    | N= 699<br>~60 years<br>45.5% male<br><br>At baseline: 49.5% employed,<br>50.5% not employed<br><br>At follow-up: 21.6% employed,<br>78.6% not employed | Leisure, home, and occupational<br>physical activity questionnaire                              | Employed had lower odds of meeting<br>physical activity recommendation<br>with nonwork physical activity<br>compared to non-employed (OR<br>0.59 [95% CI=0.4, 0.86])<br><br>Employed had higher odds of meeting<br>physical activity recommendations<br>with total physical activity compared<br>to non-employed OR (2.72 [95%<br>CI=1.88, 3.97]) | Poor (1)              |
| Brown (2009) <sup>2</sup><br>Australia       | Cohort<br>(3 years)<br>Population-based                      | N= 8762<br>51–55 years<br>Women only<br>Not reported how many retired                                                                                  | Leisure physical activity<br>Active Australia physical activity<br>survey <sup>3</sup>          | Participants who retired were more<br>likely to report an increase in leisure<br>physical activity (compared to 3 years<br>ago) than participants who were still<br>employed (OR 1.54 [95% CI=1.24,<br>1.91])                                                                                                                                     | Modest (2)            |
| Chung (2009) <sup>4</sup><br>U.S.            | Cohort<br>(6 years)<br>HRS<br>(Wave 3-6)<br>Population-based | N=11,469<br>Age not reported<br>47.1% male<br>30% retired at baseline<br>43% retired at follow-up<br>7% reversible retirement                          | Total vigorous physical activity<br>Single-item question on total<br>vigorous physical activity | No significant change in total vigorous<br>physical activity (three or more times<br>a week) in retirement                                                                                                                                                                                                                                        | Good (3)              |
| Evenson (2002) <sup>5</sup><br>U.S.          | Cohort<br>(6 years)<br>Population-based                      | N=7782<br>45–64 years<br>41.4% male<br>All employed at baseline<br>29.5% retired at follow-up                                                          | Leisure and occupational<br>physical activity<br>Baecke questionnaire <sup>6</sup>              | Exercise participation increased for all<br>gender and ethnic groups in<br>retirement<br><br>No results for occupational physical<br>activity reported                                                                                                                                                                                            | Modest (2)            |
| Fonseca (2004) <sup>7</sup><br>Portugal      | Cross-sectional<br>Population-based                          | N=100<br>M 59.4 years (SD 4.6)<br>50% male<br>50% retired                                                                                              | Total physical activity<br>Single-item question on total<br>physical activity                   | No difference in total physical activity<br>between retirees and employees                                                                                                                                                                                                                                                                        | Poor (1)              |

| Study and country                              | Design (follow-up)                           | Participants (N, age, gender, retirement status)                                                                                                             | Assessment of physical activity                                                                      | Results                                                                                                                                                                                                                                                  | Quality ranking (0-4) |
|------------------------------------------------|----------------------------------------------|--------------------------------------------------------------------------------------------------------------------------------------------------------------|------------------------------------------------------------------------------------------------------|----------------------------------------------------------------------------------------------------------------------------------------------------------------------------------------------------------------------------------------------------------|-----------------------|
| Glamser (1985) <sup>8</sup><br>U.S.            | Cohort<br>(6 years)<br>Employee-based        | N=51<br>~62 years<br>Male only<br>All employed at baseline<br>All retired at follow-up                                                                       | Leisure physical activity<br>Based on list of leisure activities                                     | No change in leisure-time physical activity in retirement                                                                                                                                                                                                | Poor (1)              |
| Henkens (2008) <sup>9</sup><br>Netherlands     | Cohort<br>(6 years)<br>Employee-based        | N=1604<br>M 54.8 years (SD 2.8)<br>75% male<br>All employed at baseline<br>55.1% retired at follow-up                                                        | Exercise physical activity<br>Single-item question on change in exercise                             | Participants who retired were more likely to report an increase in exercise (compared to 5 years ago) than participants who were still employed (RR 2.90 [95% CI=2.19, 3.84] in voluntary retired; RR 2.14 [95% CI=1.47, 3.13] in involuntarily retired) | Poor (1)              |
| Mein (2005) <sup>10</sup><br>United Kingdom    | Cross-sectional<br>Employee-based            | N= 6224<br>45-69 years<br>26.0% male<br>36.4% retired                                                                                                        | Leisure and home physical activity<br>Questionnaire                                                  | Retirees were more likely to meet physical activity recommendations than participants who were still employed (OR 2.5 [95% CI= 1.9, 3.5] in women; OR 3.5 [95% CI=2.8, 4.3] in men)                                                                      | Good (3)              |
| Midanik (1995) <sup>11</sup><br>U.S.           | Cohort<br>(2 years)<br>HMO insurance holders | N=595<br>M 61.8 years (retired at follow-up)<br>M 62.3 years (employed at follow-up)<br>57.5% male<br>All employed at baseline<br>53.8% retired at follow-up | Exercise physical activity<br>Single-item question on exercise                                       | Participants who retired were more likely to report participation in regular exercise than participants who were still employed (men: RR 3.5 [95% CI =2.0, 6.2]; women: RR 2.2 [95% CI=1.2, 4.0])                                                        | Modest (2)            |
| Parnes (1985) <sup>12</sup><br>U.S.            | Cross-sectional<br>Population-based          | N= 2899<br>57-71 years<br>Male only<br>60.6% retired                                                                                                         | Exercise physical activity<br>Questionnaire                                                          | More retirees participated in exercise (in last 12 months ) than employees (44% retired vs 35% employees, $p<0.01$ )                                                                                                                                     | Modest (2)            |
| Patrick (1986) <sup>13</sup><br>United Kingdom | Cohort<br>(2 years)<br>Employee-based        | N=74<br>M 65.1 years (SD 0.2)<br>71.6% male<br>All employed at baseline<br>All retired at follow-up                                                          | Total physical activity<br>Objectively measured total physical activity plus physical activity diary | Total physical activity (time and intensity) increased in men after retirement and decreased in women                                                                                                                                                    | Poor (1)              |

| Study and country                        | Design (follow-up)                                                   | Participants (N, age, gender, retirement status)                                                                                            | Assessment of physical activity                                                                     | Results                                                                                                                                                                                                                                                                                                                                                                                                                                             | Quality ranking (0–4) |
|------------------------------------------|----------------------------------------------------------------------|---------------------------------------------------------------------------------------------------------------------------------------------|-----------------------------------------------------------------------------------------------------|-----------------------------------------------------------------------------------------------------------------------------------------------------------------------------------------------------------------------------------------------------------------------------------------------------------------------------------------------------------------------------------------------------------------------------------------------------|-----------------------|
| Slingerland (2007) <sup>14</sup><br>U.S. | Cohort<br>(13 years)<br>Population-based                             | N=971<br>M 50.5 years (SD 5.3)<br>75.0% male<br>All employed at baseline<br>70.4% retired at follow-up                                      | Exercise, leisure-time, and work-related transport physical activity<br>Questionnaire               | Participants who retired had lower odds of a decline in leisure-time physical activity compared to participants who were still employed (OR 0.36 [95% CI =0.19, 0.68])<br>No significant differences in changes in exercise physical activity in retired and employed<br>Participants who retired had higher odds of a decline in work-related transport physical activity compared to those who were still employed (OR 3.03 [95% CI =1.97, 4.65]) | Modest (2)            |
| Touvier (2010) <sup>15</sup><br>France   | Cohort<br>(3 years)<br>Population-based                              | N=1389<br>45–64 years<br>50.3% male<br>All employed at baseline<br>20.4% retired at follow-up                                               | Leisure and occupational physical activity<br>Modifiable Activity Questionnaire (MAQ) <sup>16</sup> | Leisure physical activity increased in retirement (M 2.1 (SD 0.4) hours/week in men;<br>M 1.8 (SD 0.4) hours/week in women)<br>No results for occupational physical activity reported                                                                                                                                                                                                                                                               | Modest (2)            |
| Wells (1999) <sup>17</sup><br>Australia  | Cross-sectional<br>Population-based                                  | N=363<br>M 69.9 years (SD 4.0)<br>Female only<br>7.7% working<br>20.0% partly retired<br>27.0% recently retired<br>36.7 % long-term retired | Total physical activity<br>Single-item question on change in total physical activity                | Retirees were more likely to report a decrease in total physical activity (compared to 5 years ago) than participants who were still employed (OR 3.89, $p<0.05$ )                                                                                                                                                                                                                                                                                  | Modest (2)            |
| Wister (1996) <sup>18</sup><br>Canada    | Cross-sectional<br>Population-based                                  | N=5333<br>>45 years<br>44.5% male<br>18.0% retired                                                                                          | Exercise physical activity<br>Single-item question on exercise physical activity                    | Retirees were more likely to participate in exercise (once a week or more) than participants who were still employed (OR 1.73, $p<0.001$ )                                                                                                                                                                                                                                                                                                          | Modest (2)            |
| Chung (2005) <sup>19</sup><br>U.S.       | Cohort<br>(2 years)<br>HRS (subsample 2001–2003)<br>Population-based | N=2762<br>M 63.5 years (SD 4.6)<br>40.7% male<br>All employed at baseline<br>55.7% retired at follow-up                                     | Total vigorous physical activity<br>Single-item question on total vigorous physical activity        | Total vigorous physical activity decreased in retirement (–3.5 [SD 1.05] MET hours/day, $p<0.01$ )                                                                                                                                                                                                                                                                                                                                                  | Good (3)              |

| Study and country                   | Design (follow-up)                                                      | Participants (N, age, gender, retirement status)                                                                                                               | Assessment of physical activity                                                                 | Results                                                                                                                                     | Quality ranking (0–4) |
|-------------------------------------|-------------------------------------------------------------------------|----------------------------------------------------------------------------------------------------------------------------------------------------------------|-------------------------------------------------------------------------------------------------|---------------------------------------------------------------------------------------------------------------------------------------------|-----------------------|
| Nekuda (2009) <sup>20</sup><br>U.S. | Cohort<br>(2 years)<br>HRS (subsample<br>1998–2000)<br>Population-based | N= 5351<br>M 58.9 years (SD 6.7)<br>remained employed<br>M 63.4 years (SD 6.9) retired<br>51.7% male<br>All employed at baseline<br>16.9% retired at follow-up | Total vigorous physical activity<br>Single-item question on total<br>vigorous physical activity | No significant change in total vigorous<br>physical activity (three or more times<br>a week) in retirement (OR 1.06 [95%<br>CI=0.89, 1.24]) | Poor (1)              |
| Parise (2004) <sup>21</sup><br>U.S. | Cohort<br>(6 years)<br>Population-based                                 | N=2091<br>54–99 years<br>40.5% male<br>76.2% retired at baseline<br>78.3% retired at follow-up                                                                 | Leisure physical activity<br>Based on list of leisure activities                                | No significant change in leisure-time<br>physical activity in retirement                                                                    | Poor (0)              |
| Zheng (2008) <sup>22</sup><br>U.S.  | Cohort<br>(6 years)<br>HRS<br>(Wave 3–6)<br>Population-based            | N=3936<br>M 54.3 years (SD 2.0)<br>Male only<br>All employed at baseline<br>52.1% retired at follow-up                                                         | Total vigorous physical activity<br>Single-item question on total<br>vigorous physical activity | Total vigorous physical activity (three or<br>more times a week) decreased in<br>retirement (OLS<br>–0.049, $p<0.05$ )                      | Modest (2)            |

Note: Studies are ordered by type (published articles followed by PhD theses) and then alphabetically by first author.

HRS, Health and Retirement Study; OLS, ordinary least-squares regression; RR, risk ratio

## References for Appendix B

- Berger U, Der G, Hannah MK, Mutrie N. The impact of retirement on physical activity. *Ageing Soc* 2005;25(2):181–95.
- Brown WJ, Heesch KC, Miller YD. Life events and changing physical activity patterns in women at different life stages. *Ann Behav Med* 2009;37(3):294–305.
- Brown WJ, Burton NW, Marshall AL, Miller YD. Reliability and validity of a modified self-administered version of the Active Australia physical activity survey in a sample of mid-age women. *Aust NZ J Public Health* 2008;32(6):535–41.
- Chung S, Domino ME, Stearns SC, Popkin BM. Retirement and physical activity: analyses by occupation and wealth. *Am J Prev Med* 2009;36(5):422–8.
- Evenson KR, Rosamond WD, Cai J, Diez-Roux AV, Brancati FL. Influence of retirement on leisure-time physical activity: The Atherosclerosis Risk in Communities Study. *Am J Epidemiol* 2002;155(8):692–9.

6. Baecke J, Burema J, Frijters J. A short questionnaire for the measurement of habitual physical activity in epidemiological studies. *Am J Clin Nutr* 1982;36:936–42.
7. Fonseca AM, Paúl C. Health and aging: Does retirement transition make any difference? *Rev Clin Gerontol* 2003;13(3):257–60.
8. Glamser FD, Hayslip B. The Impact of Retirement on Participation in Leisure Activities. *Ther Recreation J* 1985;19:28–38.
9. Henkens K, van Solinge H, Gallo WT. Effects of retirement voluntariness on changes in smoking, drinking and physical activity among Dutch older workers. *Eur J Public Health* 2008;18(6):644–9.
10. Mein GK, Shipley MJ, Hillsdon M, Ellison GT, Marmot MG. Work, retirement and physical activity: cross-sectional analyses from the Whitehall II study. *Eur J Public Health* 2005;15(3):317–22.
11. Midanik LT, Soghikian K, Ransom LJ, Tekawa IS. The effect of retirement on mental-health and health behaviors—the Kaiser Permanente Retirement Study. *J Gerontol B Psychol Sci Soc Sci* 1995;50(1):S59–S61.
12. Parnes H, Less L. Variation in selected forms of leisure activity among elderly males. In: *Current perspectives on aging and the life cycle: Work, retirement and social policy*. Greenwich CT: JAI Press, 1985.
13. Patrick JM, Bassey EJ, Irving JM, Blecher A, Fentem PH. Objective measurements of customary physical activity in elderly men and women before and after retirement. *Q J Exp Physiol* 1986;71(1):47–58.
14. Slingerland AS, van Lenthe FJ, Jukema J, et al. Aging, retirement, and changes in physical activity: prospective cohort findings from the GLOBE Study. *Am J Epidemiol* 2007;165(12):1356–63.
15. Touvier M, Bertrais S, Charreire H, Vergnaud AC, Hercberg S, Oppert JM. Changes in leisure-time physical activity and sedentary behaviour at retirement: a prospective study in middle-aged French subjects. *Int J Behav Nutr Phys Act* 2010;7:1–14.
16. Vuillemin A, Oppert JM, Guillemin F, et al. Self-administered questionnaire compared with interview to assess past-year physical activity. *Med Sci Sports Exerc* 2000;32:1119–24.
17. Wells YD, Kendig HL. Psychological resources and successful retirement. *Aust Psychol* 1999;34(2):111–5.
18. Wister A. The effects of socioeconomic status on exercise and smoking: age-related differences. *J Aging Health* 1996;8(4):467.
19. Chung S. Retirement and obesity among the near elderly [dissertation]. Chapel Hill: University of North Carolina, 2005.
20. Nekuda JD. The effect of retirement on vigorous physical activity controlling for the socio-demographic variables of age, gender, education, income, race and perceived health status affect [dissertation]. Lincoln NE: University of Nebraska, 2009.
21. Parise C. Characteristics of older adult exercisers [dissertation]. Davis CA: University of California, Davis, 2004.
22. Zheng Y. Economic determinants of obesity among old Americans [dissertation]. Santa Monica CA: Pardee RAND Graduate School, 2008.
